# Supplementary material for: Modulation of the CaCO3 phase and morphology by tuning the sequence of addition: an insight into the formation of monohydrocalcite
Source: Royal Society of Chemistry journal article supplement (doi:10.1039/d1nj03707b), 2021-01-01
Supplement: d1nj03707b1.pdf [file d1nj03707b1.pdf]

## **Supporting Information**

### **Modulation of CaCO<sub>3</sub> Phase and Morphology by Tuning the Sequence of Addition: An Insight into the Formation of Monohydrocalcite**

Debojit Paul,<sup>a</sup> Deepa Sachan,<sup>b</sup> Subhadeep De<sup>a</sup> and Gopal Das<sup>\*ab</sup>

<sup>a</sup> Department of Chemistry, Indian Institute of Technology Guwahati, Assam 781039, India.

<sup>b</sup> Centre for the Environment, Indian Institute of Technology Guwahati, Assam 781039,  
India.

Fax: + 91 361 258 2349; Tel: +91 361258 2313; E-mail: gdas@iitg.ac.in

**Materials and Instruments:** All the materials for synthesis and experiments were purchased from Sigma-Aldrich and used without further purification.

The FT-IR spectra of the dried compounds were recorded on a PerkinElmer-Spectrum One FT-IR spectrometer with KBr pellets in the range 1800–400  $\text{cm}^{-1}$ . The Powder XRD and the quantitative analysis results of the samples were obtained from the Rigaku Smartlab X-ray Spectrophotometer with Cu-K $\alpha$  ( $\lambda=1.54 \text{ \AA}$ ), source running at a power of 9 KW. The particle sizes and zeta potential were measured by dynamic light scattering (DLS) experiments at pH 7 and temperature 20 °C on Anton Paar Litesizer 500 instrument. The morphology of the particles was investigated by using FESEM imaging studies using Sigma 300 FESEM (Carl Zeiss). The EDX elemental analysis and mapping were performed in Sigma (Zeiss). The TGA analysis was performed in Netzsch, STA449F3A00.

## Methods

### *Preparation of Tulsi extract in methanol and water*

Fresh leaves were collected in their blooming stage from several spots at IIT Guwahati campus. The leaves were thoroughly washed with water so as to remove the external impurities and dried at room temperature for 48 hours. The dried leaves were then powdered, and in each extraction process, 2 grams of the dried powder was subjected to reflux in 50 ml of methanol and water, respectively. The extracts were then collected by filtering through regular filter paper.

### *Preparation of Green tea extract in methanol and water*

Green tea in its purest form and of the finest quality was obtained from the local tea gardens of Assam. The powdered leaves, 3 grams, were subjected to reflux as such in 50 ml of methanol and water, respectively, followed by filtration through regular filter paper to obtain the pure extracts.

### *Reusability of tulsi extract in methanol and the effectiveness of the mixture of tulsi and green tea extracts in methanol*

In the reusability experiment, the crystallization process using tulsi extract in methanol was studied to observe whether the template retains its effectiveness even after several cycles. In this experiment, the filtrate that was obtained on filtering the suspension after the crystallization process was used to perform the templating role for the next cycle, all other

steps in the procedure were kept the same. A total of three cycles were performed to study the effects of reusing the extract. In another experiment, both the tulsi and the green tea extracts in methanol were mixed in a ratio of 1:1 (2.5 ml each). They used as a template in the crystallization process to observe their role in a mixture.

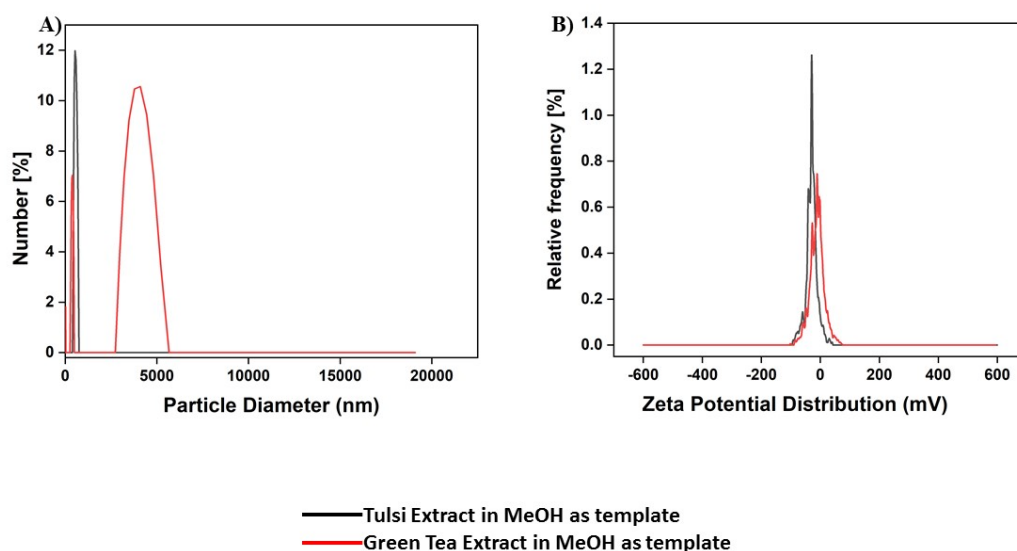

**Figure S1:** A) DLS-based particle size analysis; B) Zeta Potential of  $\text{CaCO}_3$  particles synthesized in the presence of the tulsi and green tea extract in methanol.

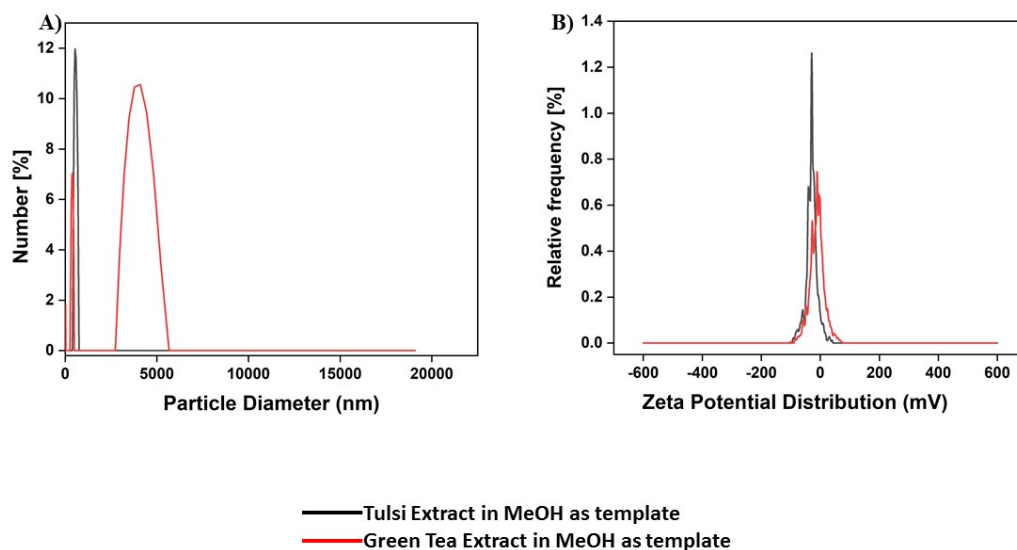

**Figure S2:** A) DLS-based particle size analysis; B) Zeta Potential of  $\text{CaCO}_3$  particles synthesized in the presence of the tulsi and green tea extract in water.

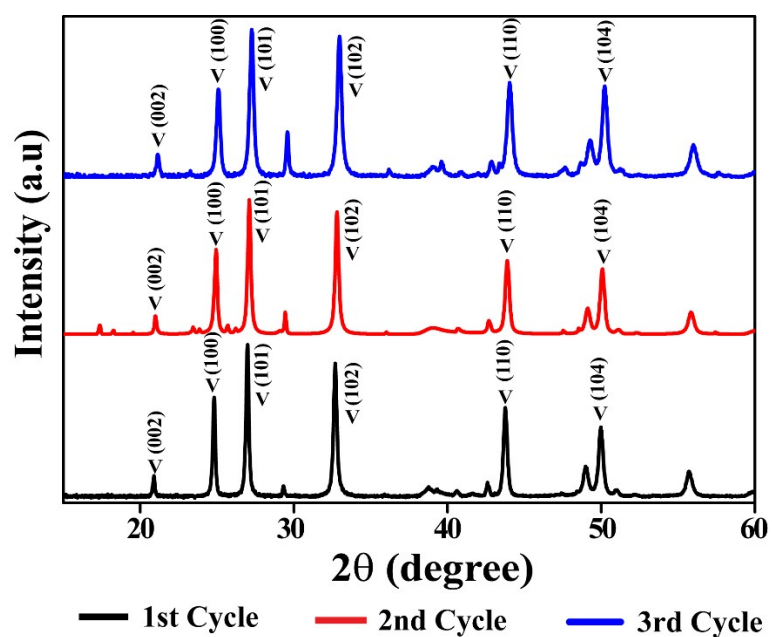

**Figure S3:** PXRD pattern showing the formation of vaterite after using the tulsi extract (in methanol) for three consecutive cycles.

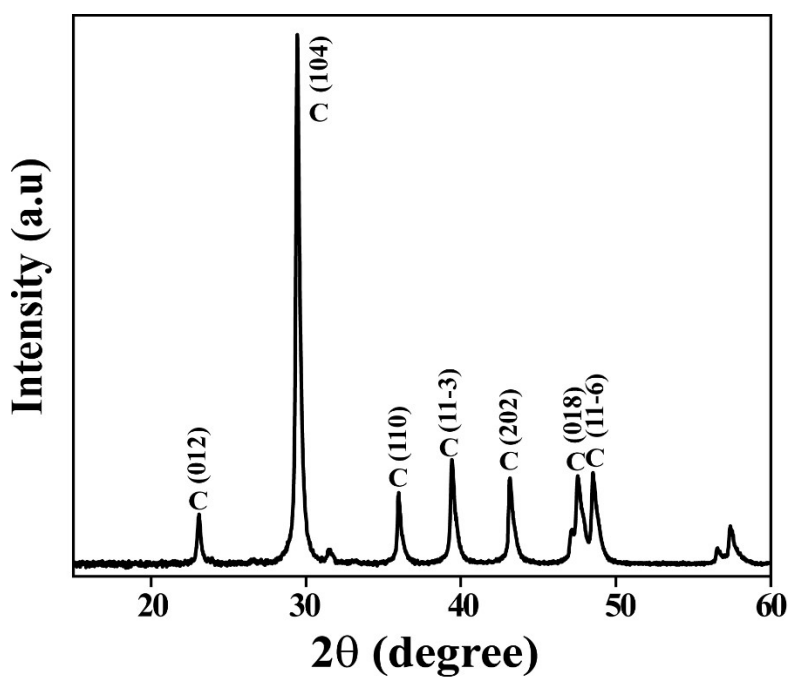

**Figure S4:** PXRD pattern showing the formation of calcite on using both the templates (tulsi and green tea in methanol) in the ratio 1:1.

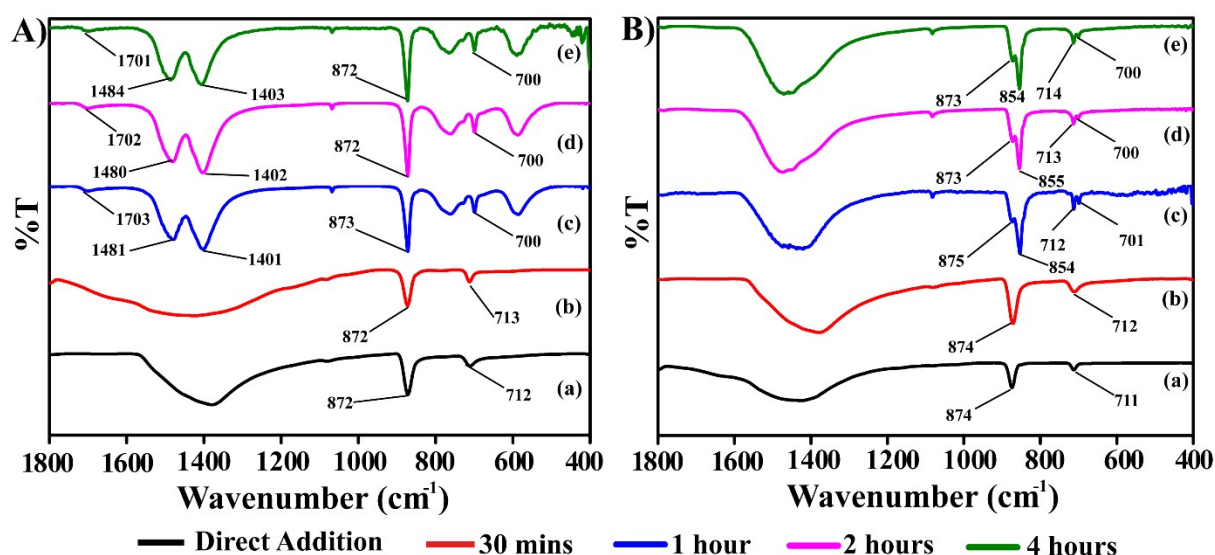

**Figure S5:** FT-IR spectra of  $\text{CaCO}_3$  particles precipitated by reverse sequence of addition at different addition rates in presence of tulsi extract in methanol followed by (A) Maturation of the particles in solution at room temperature; (B) Heating the particles in solution at 80 °C.

### Stability of ACC in solution and in the isolated state

The stability of the ACC particles in solution was studied by obtaining the FT-IR spectrum, Fig. S7 of the particles by isolating them every hour by vacuum filtration. On isolation immediately after the precipitation, it was observed that a split signal at 1475  $\text{cm}^{-1}$  and 1415  $\text{cm}^{-1}$  and a signal at 864  $\text{cm}^{-1}$ , which are characteristics of the ACC phase were present. The particles isolated after hour 1 and 2 also showed similar patterns with split signals at 1481  $\text{cm}^{-1}$  and 1418  $\text{cm}^{-1}$  and at 1473  $\text{cm}^{-1}$  and 1420  $\text{cm}^{-1}$ , respectively, and the signal at 864  $\text{cm}^{-1}$  being common in both the cases. These being the characteristics of the ACC phase, suggested the stabilization of the unstable phase in aqueous solution at least for 2 hours. The particles isolated after 3 hours showed characteristic of the calcite phase with signals at 1440  $\text{cm}^{-1}$ , 872  $\text{cm}^{-1}$  and 713  $\text{cm}^{-1}$ , suggesting the conversion of the amorphous precursor to the stable crystalline phase.

However, the isolated particles showed great stability even when stored under ambient conditions. The particles were subjected to PXRD analysis, after days 1, 4 and 7, where in each case a similar pattern with no sharp peaks but a pattern with a broad hump at  $2\theta$  equal to 32, Fig. S8(A) characteristic of the amorphous phase suggested the stability of the ACC phase. The FESEM images, Fig.S8(B), S8(C) and S8(D), of the particles were also obtained

and it could be seen that the particles remained as stable nanospheres with no change in morphology even after 7 days.

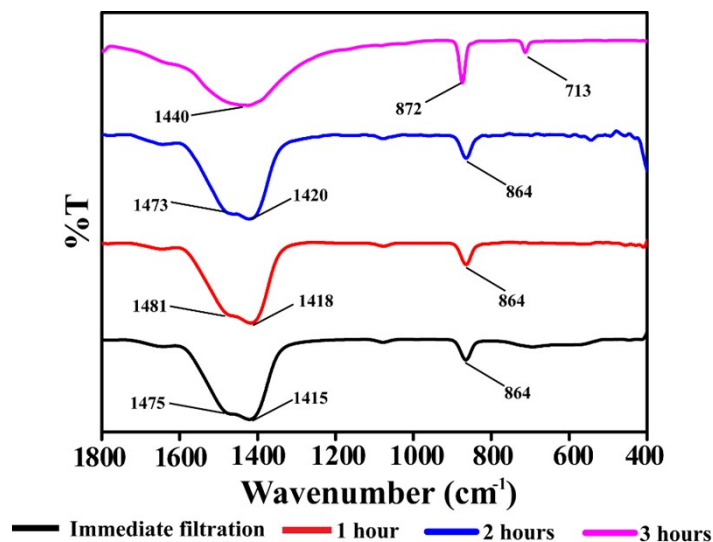

**Figure S6:** FT-IR spectra of the ACC particles isolated at 1 hour interval of time.

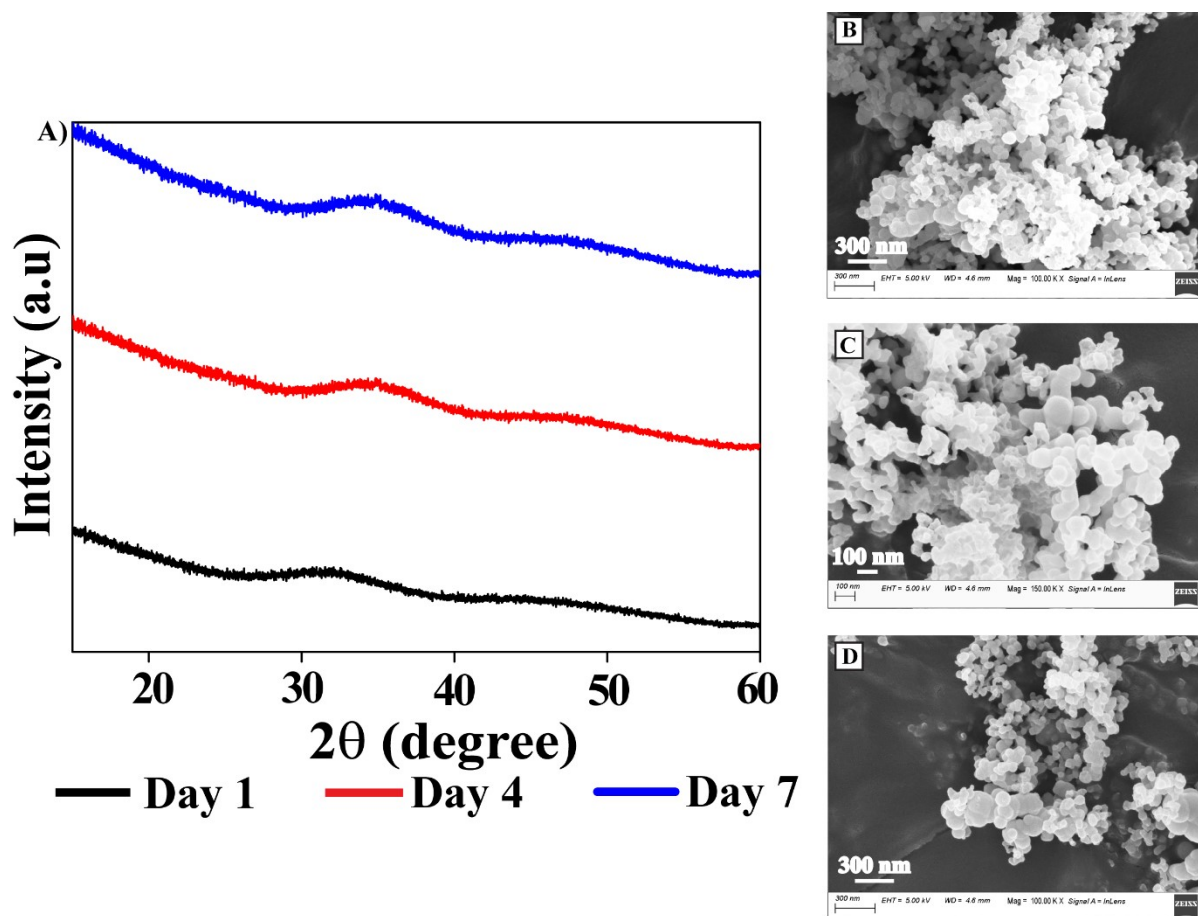

**Figure S7:** (A) PXRD pattern of the ACC particles synthesized by the reverse sequence of addition in the presence of the tulsi extract in methanol after day 1, 4 and 7; FESEM image of the ACC particles after (B) Day 1; (C) Day 4; (D) Day 7.

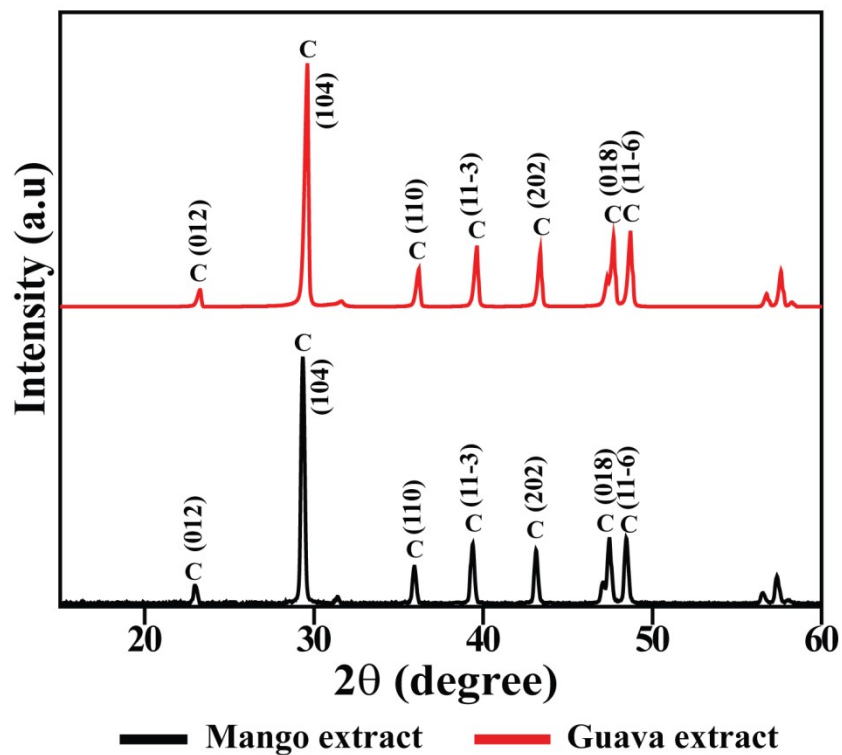

**Figure S8:** PXRD pattern of CaCO<sub>3</sub> particles precipitated in the presence of mango and guava extracts in methanol.

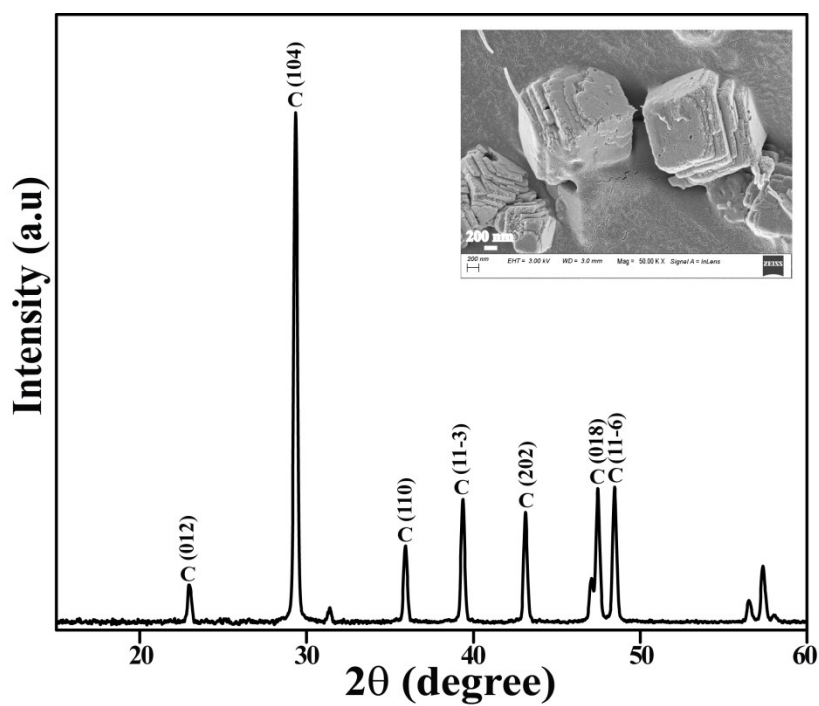

**Figure S9:** PXRD pattern and FESEM image of CaCO<sub>3</sub> particles precipitated by the reverse sequence of addition in the presence of the green tea extract in methanol.

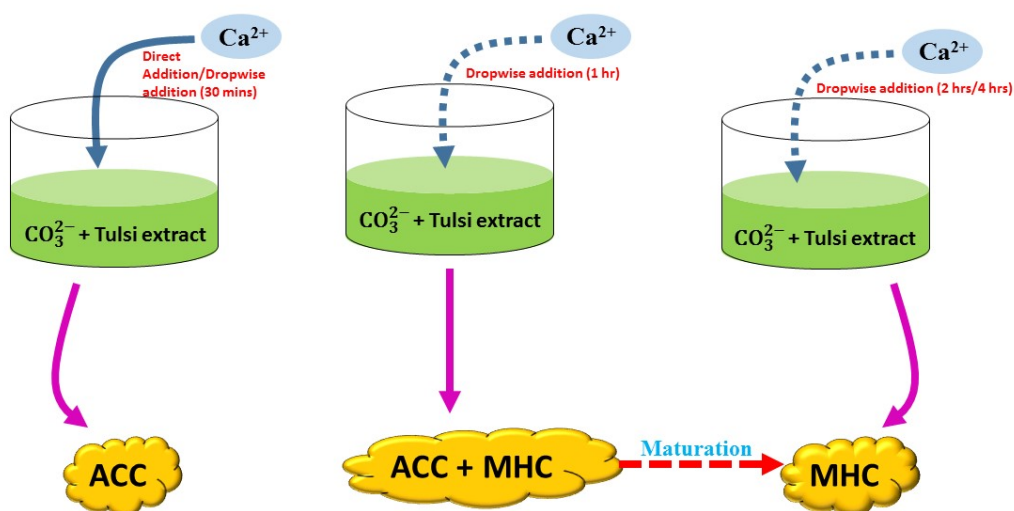

**Scheme S1:** Illustration of the reverse sequence of addition in the presence of tulsi extract (in methanol) to obtain the MHC phase via the amorphous precursor.

**Table S1: Phytochemical constituents of Tulsi and Green Tea**

| <i>Tulsi (Ocimum sanctum)</i>  | <i>Green Tea (Camellia sinensis)</i> |
|--------------------------------|--------------------------------------|
| Proteins                       | Proteins                             |
| Amino acids                    | Amino acids                          |
| Carbohydrates                  | Carbohydrates                        |
| Phenolic compounds             | Phenolic compounds                   |
| Flavonoids                     | Flavonoids (Catechin)                |
| Glycosides                     | Alkaloids (Caffeine)                 |
| Tannins                        | Fibers                               |
| Steroids                       | Vitamins                             |
| Sterols                        | Sterols                              |
| Terpenoids                     | Minerals and Trace elements          |
| Minerals and Trace elements    |                                      |
| Organic acids                  |                                      |
| Essential oils and Fatty acids |                                      |



**Table S2: Phytochemical constituents in Methanol and Aqueous extracts of Tulsi**

| <b><i>Phytochemicals</i></b>   | <b><i>Methanol extract</i></b> | <b><i>Aqueous extract</i></b> |
|--------------------------------|--------------------------------|-------------------------------|
| Proteins                       | -                              | -                             |
| Carbohydrates                  | +                              | -                             |
| Phenols                        | +                              | +                             |
| Flavonoids                     | +                              | +                             |
| Tannins                        | +                              | -                             |
| Glycosides                     | +                              | +                             |
| Steroids                       | -                              | -                             |
| Terpenoids                     | +                              | -                             |
| Essential oils and Fatty acids | +                              | -                             |

**Table S3: Percentage concentration of the major phytochemical constituents in Methanol extract of Tulsi**

| <b><i>Phytochemicals</i></b>   | <b><i>Concentration</i></b> |
|--------------------------------|-----------------------------|
| Proteins                       | ~21%                        |
| Carbohydrates                  | ~40%                        |
| Phenols (mg/g)                 | ~2 mg/g                     |
| Flavonoids (mg/g)              | ~29 mg/g                    |
| Glycosides                     | ~3.50%                      |
| Essential oils and Fatty acids | ~3.60%                      |

**Table S4: Acids and Essential oils and Fatty acids present in the methanol extract of Tulsi**

| <i>Acids</i>             | <i>Essential oils and Fatty acids</i> |
|--------------------------|---------------------------------------|
| Oleanolic acid           | Eugenol                               |
| Ursolic acid             | Methyl Eugenol                        |
| Rosmarinic acid          | Carvacrol                             |
| Tuberonic acid           | Lauric acid                           |
| 4-Hydroxypelargonic acid | Myristic acid                         |
| 5-Phenylvaleric acid     | Palmitic acid                         |
| Usnic acid               | Palmitoleic acid                      |
| Pteroyl-D-glutamic acid  | Stearic acid                          |
| Undecylic acid           | Oleic acid                            |
| 3-Phenoxypropionic acid  | Linoleic acid                         |
| 5-Phenylvaleric acid     | Linolenic acid                        |
| 6-Methyl caprylic acid   |                                       |

**Table S5: Phase obtained on performing the reverse sequence of addition with varying time of dropwise addition**

| <i>Time taken for addition</i> | <i>Initial phase obtained</i> | <i>On maturation (3 hours)</i> | <i>On heating (at 80 °C)</i> |
|--------------------------------|-------------------------------|--------------------------------|------------------------------|
| Direct addition                | ACC                           | Calcite                        | Calcite                      |
| 30 mins                        | ACC                           | Calcite                        | Calcite                      |
| 1 hour                         | MHC + ACC                     | MHC                            | MHC + Calcite                |
| 2 hours                        | MHC                           | MHC                            | MHC + Calcite                |
| 4 hours                        | MHC                           | MHC                            | MHC + Calcite                |
